# Supplementary material
Source: PubMed Central journal article supplement (PMC3417767)

## Electronic Supplementary Information

# 7-Substituted 8-aza-7-deazaadenosine for modification of the siRNA major groove

José M. Ibarra-Soza, Alexi A. Morris, Prasanna Jayalath, Hayden Peacock,  
Wayne E. Conrad, Michael B. Donald, Mark J. Kurth and Peter A. Beal\*

*Department of Chemistry, University of California, Davis, One Shields Avenue,  
Davis, California 95616, USA.*

|                                                                                                                      | Page |
|----------------------------------------------------------------------------------------------------------------------|------|
| Thermal melting ( $T_m$ ) analysis table. . . . .                                                                    | S2   |
| Titration of the PIK3CB siRNA. . . . .                                                                               | S3   |
| Triazole <b>IV</b> 12-mer RNA: Representative MALDI-TOF MS. . . . .                                                  | S4   |
| Triazole <b>I</b> at guide 15 21-mer RNA: Representative MALDI-TOF MS. . . . .                                       | S5   |
| <i><math>^1\text{H}</math> NMR / <math>^{13}\text{C}</math> NMR / <math>^{31}\text{P}</math> NMR / MALDI-TOF MS.</i> |      |
| Compound 2: $^1\text{H}$ NMR ( $\text{CDCl}_3$ , 600 MHz) . . . . .                                                  | S6   |
| Compound 2: $^{13}\text{C}$ NMR ( $\text{CDCl}_3$ , 150 MHz) . . . . .                                               | S7   |
| Compound 4: $^1\text{H}$ NMR ( $\text{CD}_2\text{Cl}_2$ , 600 MHz) . . . . .                                         | S8   |
| Compound 4: $^{13}\text{C}$ NMR ( $\text{CD}_2\text{Cl}_2$ , 150 MHz) . . . . .                                      | S9   |
| Compound 6: $^{31}\text{P}$ NMR ( $\text{CD}_2\text{Cl}_2$ , 121 MHz) . . . . .                                      | S10  |
| Compound 3: $^1\text{H}$ NMR ( $\text{CD}_2\text{Cl}_2$ , 300 MHz) . . . . .                                         | S11  |
| Compound 3: $^{13}\text{C}$ NMR ( $\text{CD}_2\text{Cl}_2$ , 75 MHz) . . . . .                                       | S12  |
| Compound 5: $^1\text{H}$ NMR ( $\text{CD}_2\text{Cl}_2$ , 300 MHz) . . . . .                                         | S13  |
| Compound 5: $^{13}\text{C}$ NMR ( $\text{CD}_2\text{Cl}_2$ , 75 MHz) . . . . .                                       | S14  |
| Compound 7: $^{31}\text{P}$ NMR ( $\text{CD}_2\text{Cl}_2$ , 121 MHz) . . . . .                                      | S15  |
| Compound 8: $^1\text{H}$ NMR ( $\text{CDCl}_3$ , 600 MHz) . . . . .                                                  | S16  |
| Compound 8: $^{13}\text{C}$ NMR ( $\text{CDCl}_3$ , 150 MHz) . . . . .                                               | S17  |
| Compound 9: $^1\text{H}$ NMR ( $\text{CDCl}_3$ , 600 MHz) . . . . .                                                  | S18  |
| Compound 9: $^{13}\text{C}$ NMR ( $\text{CDCl}_3$ , 150 MHz) . . . . .                                               | S19  |

**Supplementary Information Table 1:**  $T_m$  data for all 12-bp RNA duplexes reported in **Figure 3**.

| <b>X =</b>          | <b>Y=</b> | <b>Ave <math>T_m</math> (°C)</b> | <b>Std Dev (°C)</b> | <b>Temp start (°C)</b> | <b>Temp end (°C)</b> |
|---------------------|-----------|----------------------------------|---------------------|------------------------|----------------------|
| <b>Adenosine</b>    | U         | 43.1                             | 0.6                 | 10                     | 65                   |
|                     | C         | 34.2                             | 0.5                 | 10                     | 60                   |
|                     | A         | 32.4                             | 0.4                 | 10                     | 60                   |
|                     | G         | 32.5                             | 0.5                 | 10                     | 60                   |
| <b>Propargyl</b>    | U         | 41.4                             | 1.0                 | 12                     | 60                   |
|                     | C         | 34.0                             | 0.4                 | 12                     | 60                   |
|                     | A         | 32.7                             | 0.2                 | 12                     | 60                   |
|                     | G         | 31.6                             | 0.7                 | 10                     | 60                   |
| <b>Ethynyl</b>      | U         | 39.8                             | 0.2                 | 10                     | 65                   |
|                     | C         | 30.5                             | 0.6                 | 10                     | 60                   |
|                     | A         | 30.9                             | 0.3                 | 10                     | 60                   |
|                     | G         | 30.6                             | 0.1                 | 10                     | 60                   |
| <b>Triazole I</b>   | U         | 41.6                             | 0.3                 | 10                     | 65                   |
|                     | C         | 33.2                             | 0.7                 | 10                     | 60                   |
|                     | A         | 31.8                             | 0.5                 | 10                     | 60                   |
|                     | G         | 31.5                             | 0.4                 | 10                     | 60                   |
| <b>Triazole II</b>  | U         | 40.3                             | 0.5                 | 10                     | 65                   |
|                     | C         | 31.5                             | 0.6                 | 10                     | 60                   |
|                     | A         | 30.7                             | 0.2                 | 10                     | 60                   |
|                     | G         | 30.5                             | 0.2                 | 10                     | 60                   |
| <b>Triazole III</b> | U         | 39.7                             | 0.5                 | 10                     | 60                   |
|                     | C         | 32.1                             | 0.3                 | 14                     | 60                   |
|                     | A         | 30.7                             | 0.4                 | 14                     | 60                   |
|                     | G         | 30.4                             | 0.8                 | 14                     | 60                   |
| <b>Triazole IV</b>  | U         | 39.4                             | 0.3                 | 13                     | 60                   |
|                     | C         | 31.2                             | 0.2                 | 13                     | 60                   |
|                     | A         | 31.2                             | 0.4                 | 13                     | 60                   |
|                     | G         | 30.5                             | 0.5                 | 13                     | 60                   |
| <b>Triazole V</b>   | U         | 34.9                             | 1.4                 | 15                     | 65                   |
|                     | C         | 29.1                             | 2.9                 | 15                     | 65                   |
|                     | A         | 27.5                             | 0.4                 | 10                     | 50                   |
|                     | G         | 28.8                             | 1.0                 | 13                     | 60                   |
| <b>Triazole VI</b>  | U         | 35.9                             | 0.6                 | 15                     | 65                   |
|                     | C         | 28.1                             | 1.1                 | 10                     | 60                   |
|                     | A         | 28.0                             | 0.6                 | 10                     | 50                   |
|                     | G         | 27.9                             | 0.5                 | 10                     | 50                   |

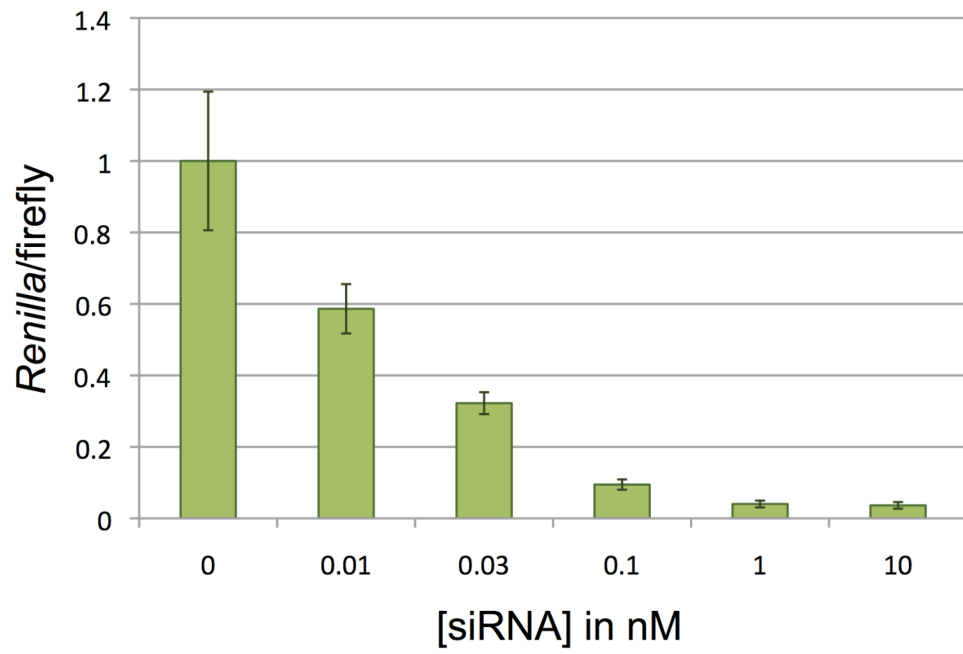

**Supplementary Figure 1:** Representative siRNA titration of the PIK3CB siRNA, modified with Triazole I at guide position 15.

5' -CAU UAX GGU GGG-3'

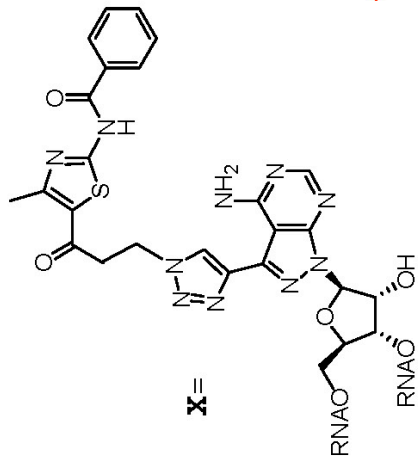

[M+H]<sup>+</sup>  
Calc. 4201.7  
Obs. 4201.6  
DNA standard = 4366.8 Da

4700 Linear Spec #1 MC=>SMS=>MC[BP = 4200.9, 199]

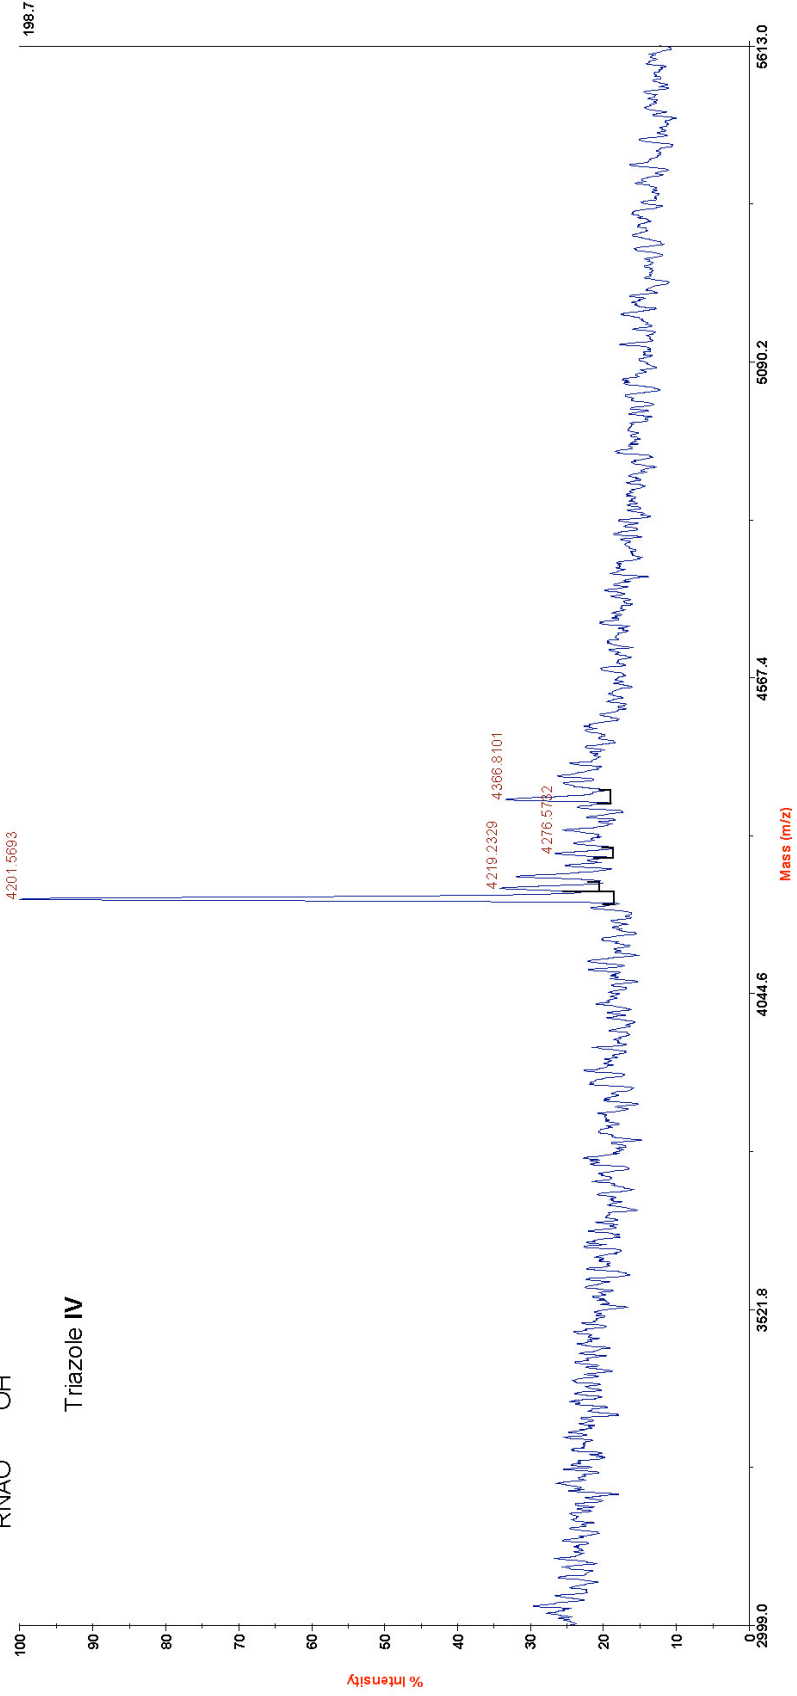

4700 Linear Spec #1 MC=>SM5=>SM5=>SM5=>SM5=>BC[BP = 4368.6, 35]

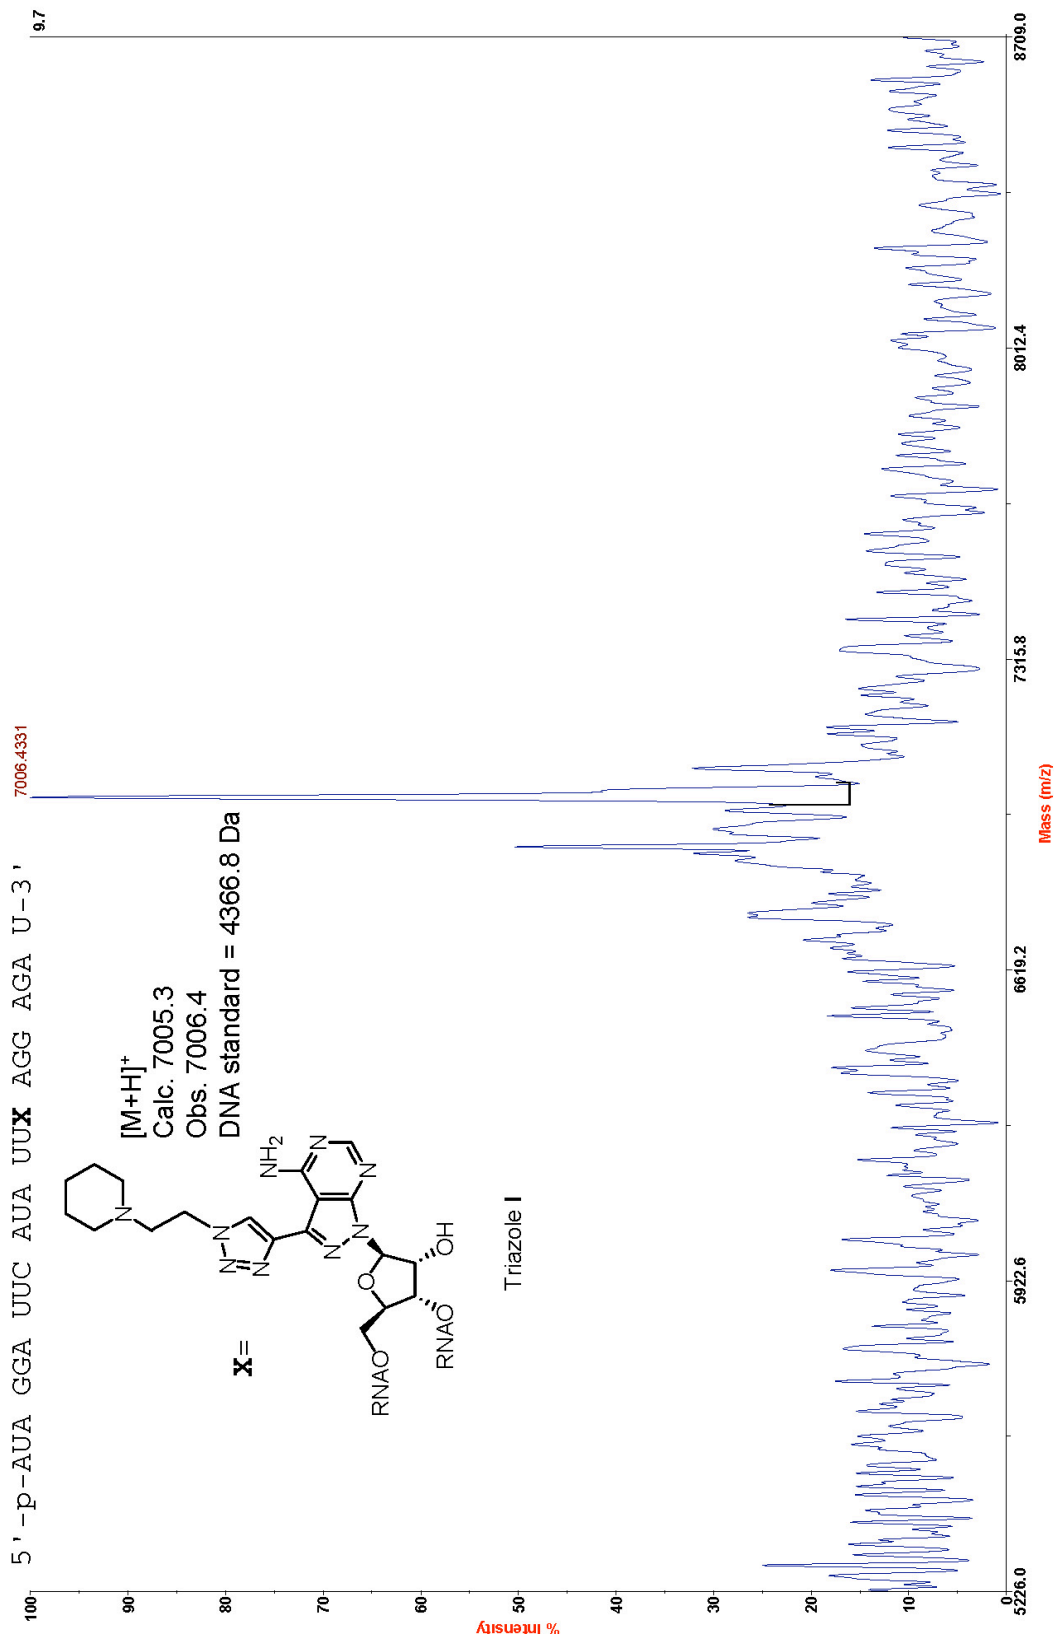

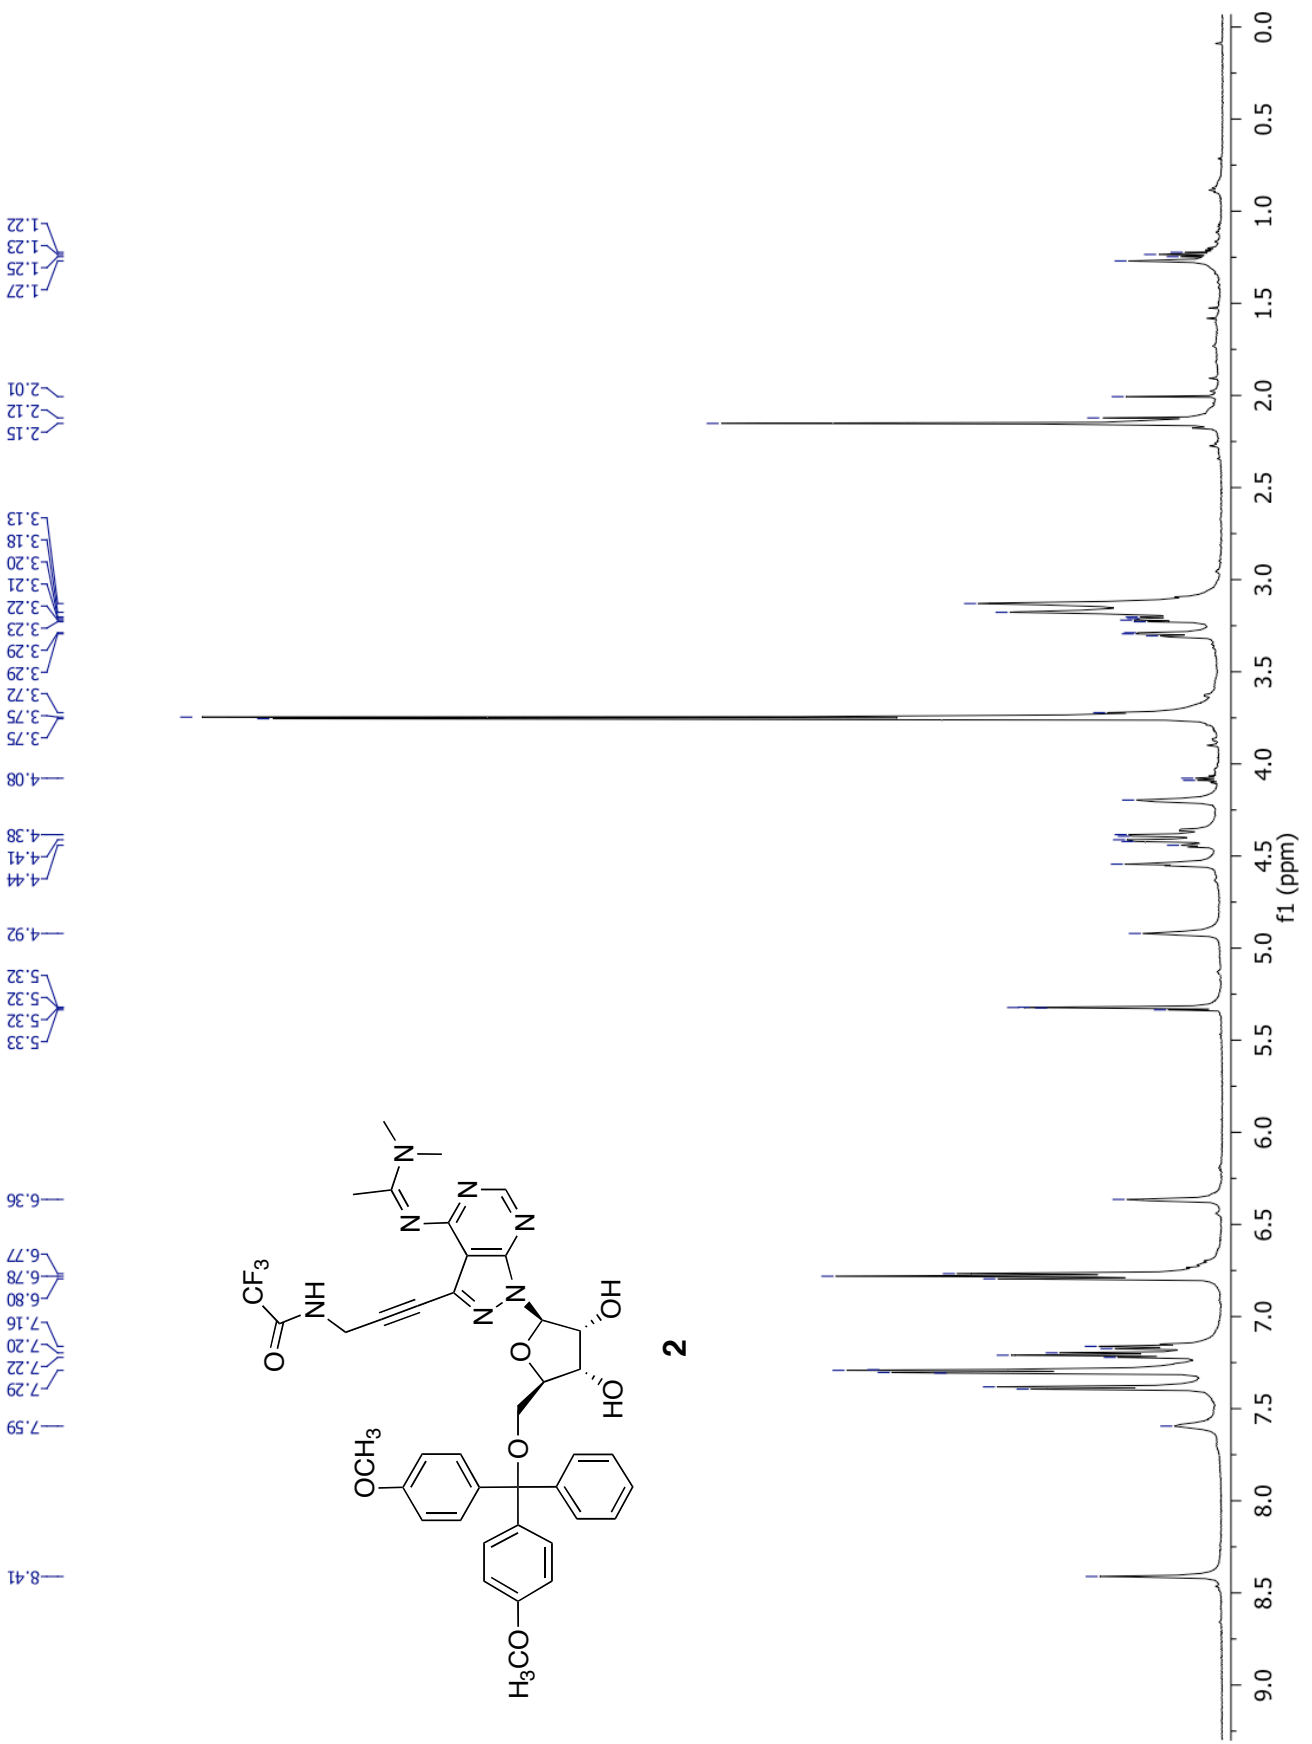

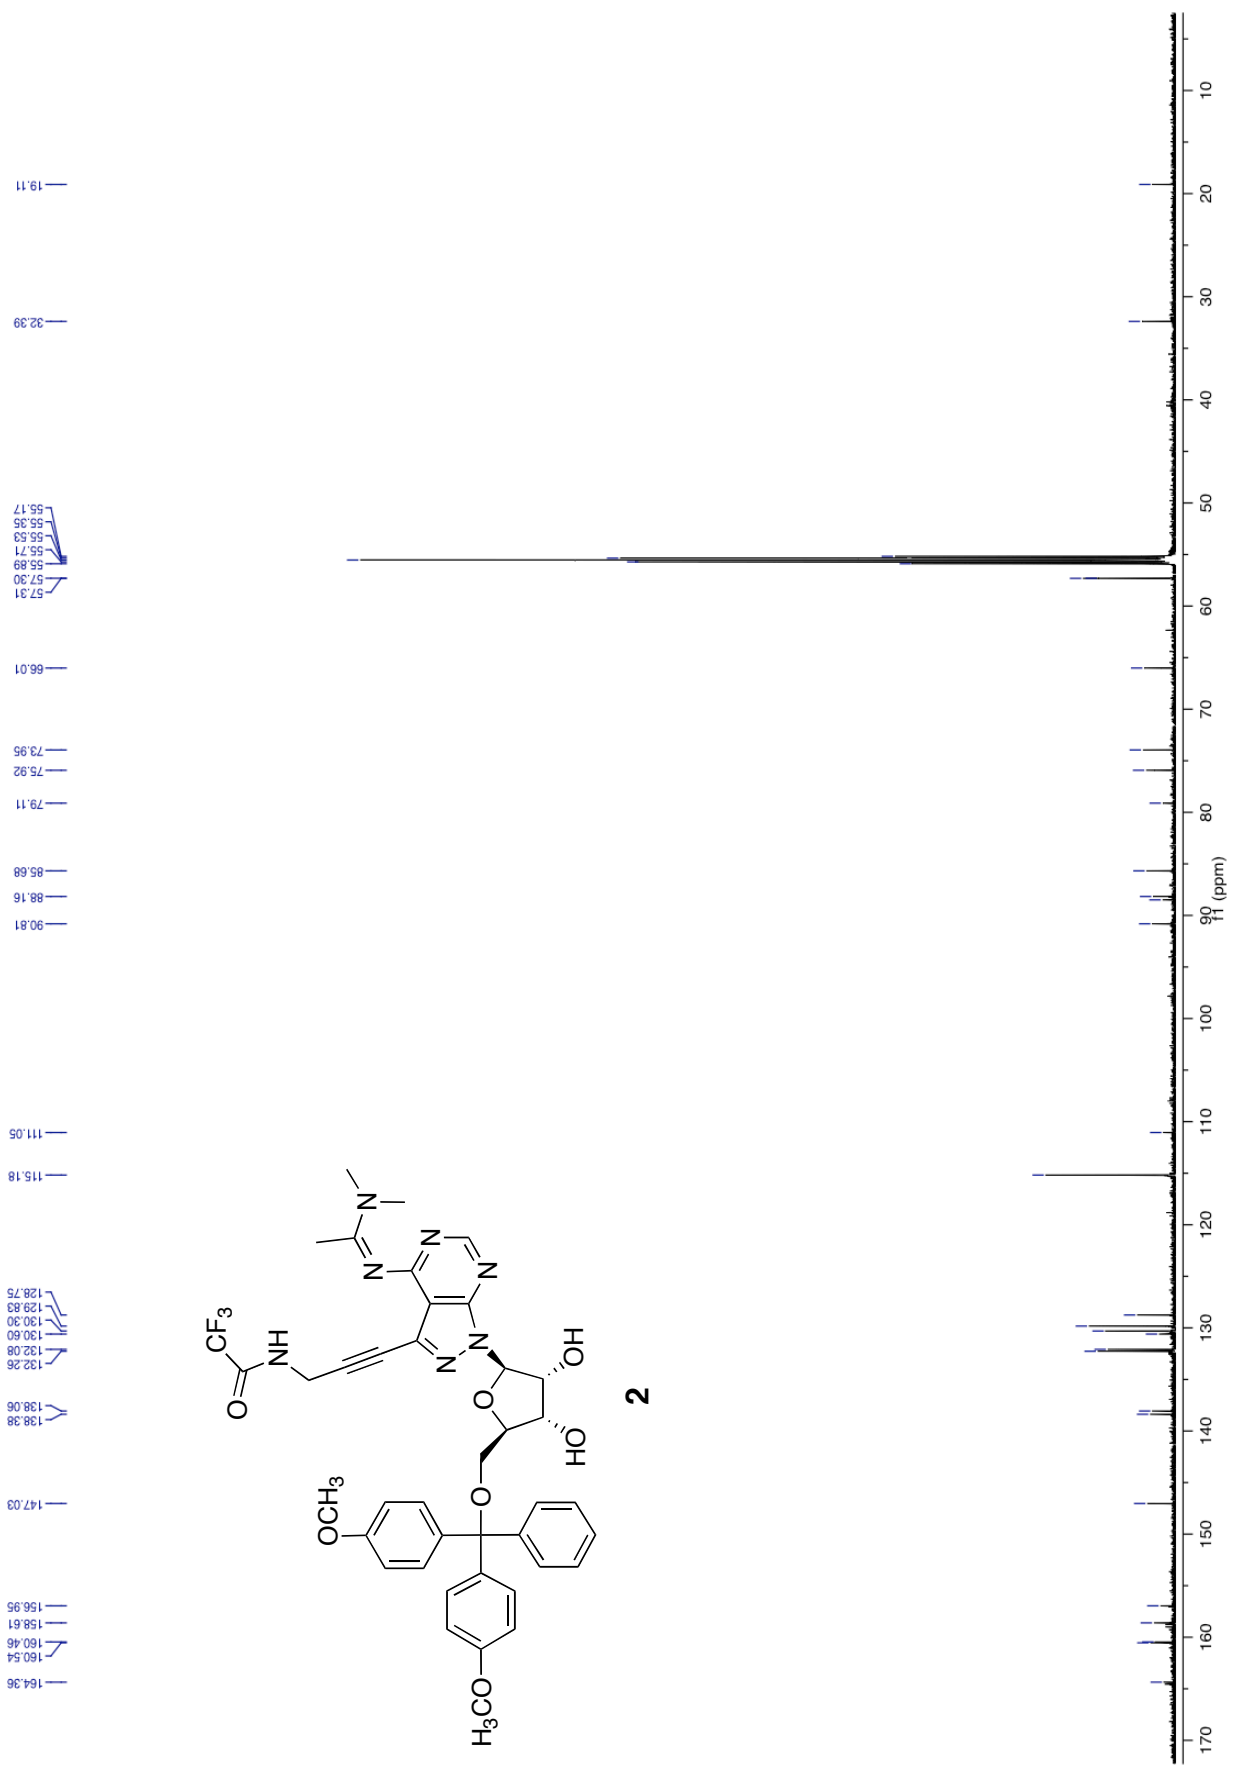

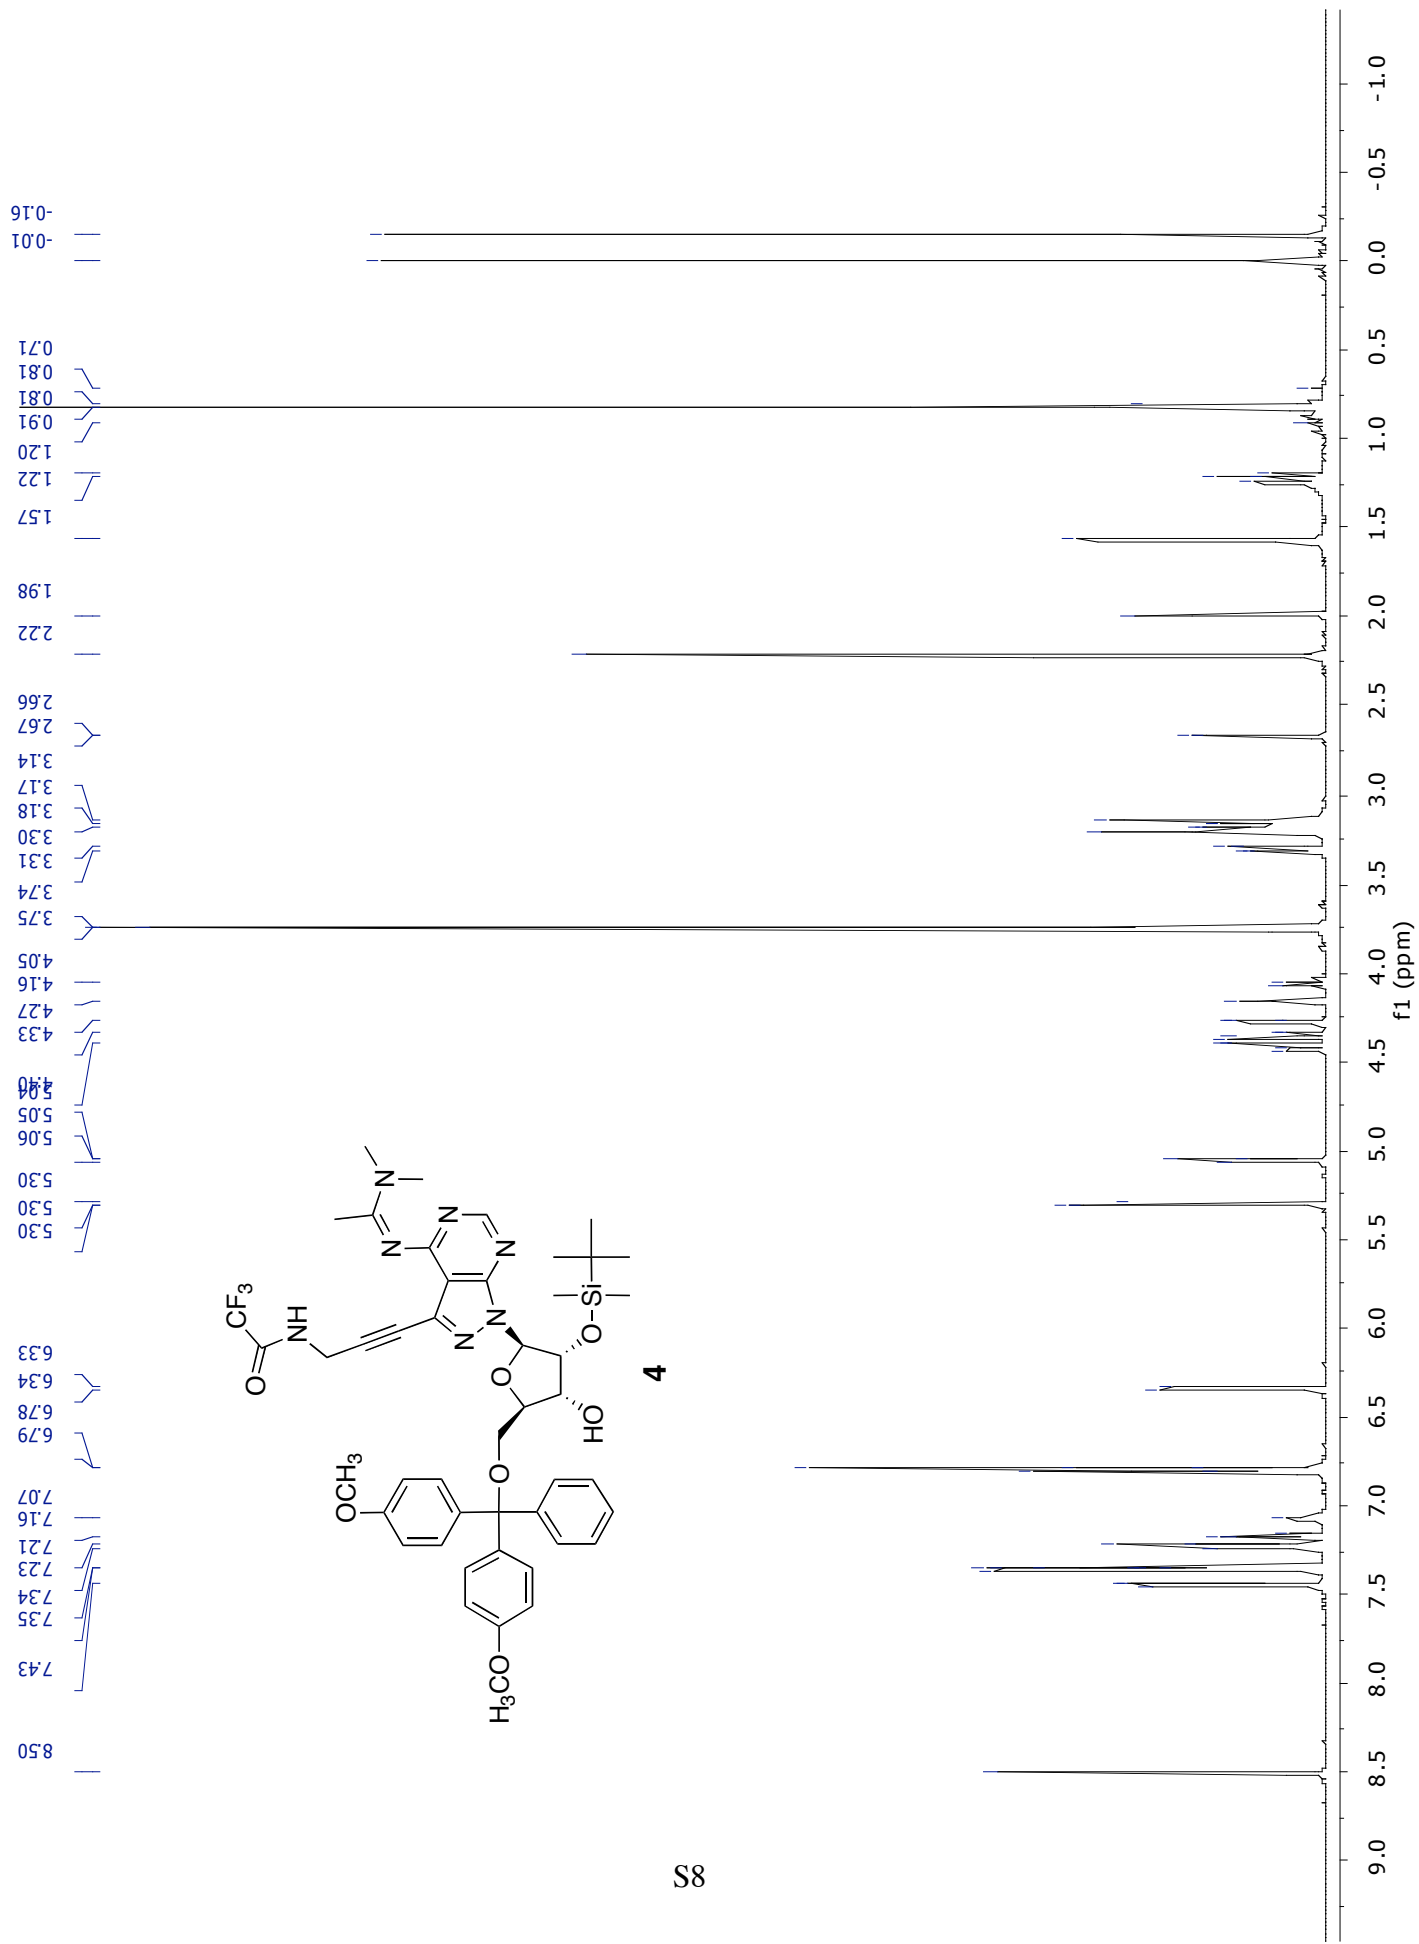



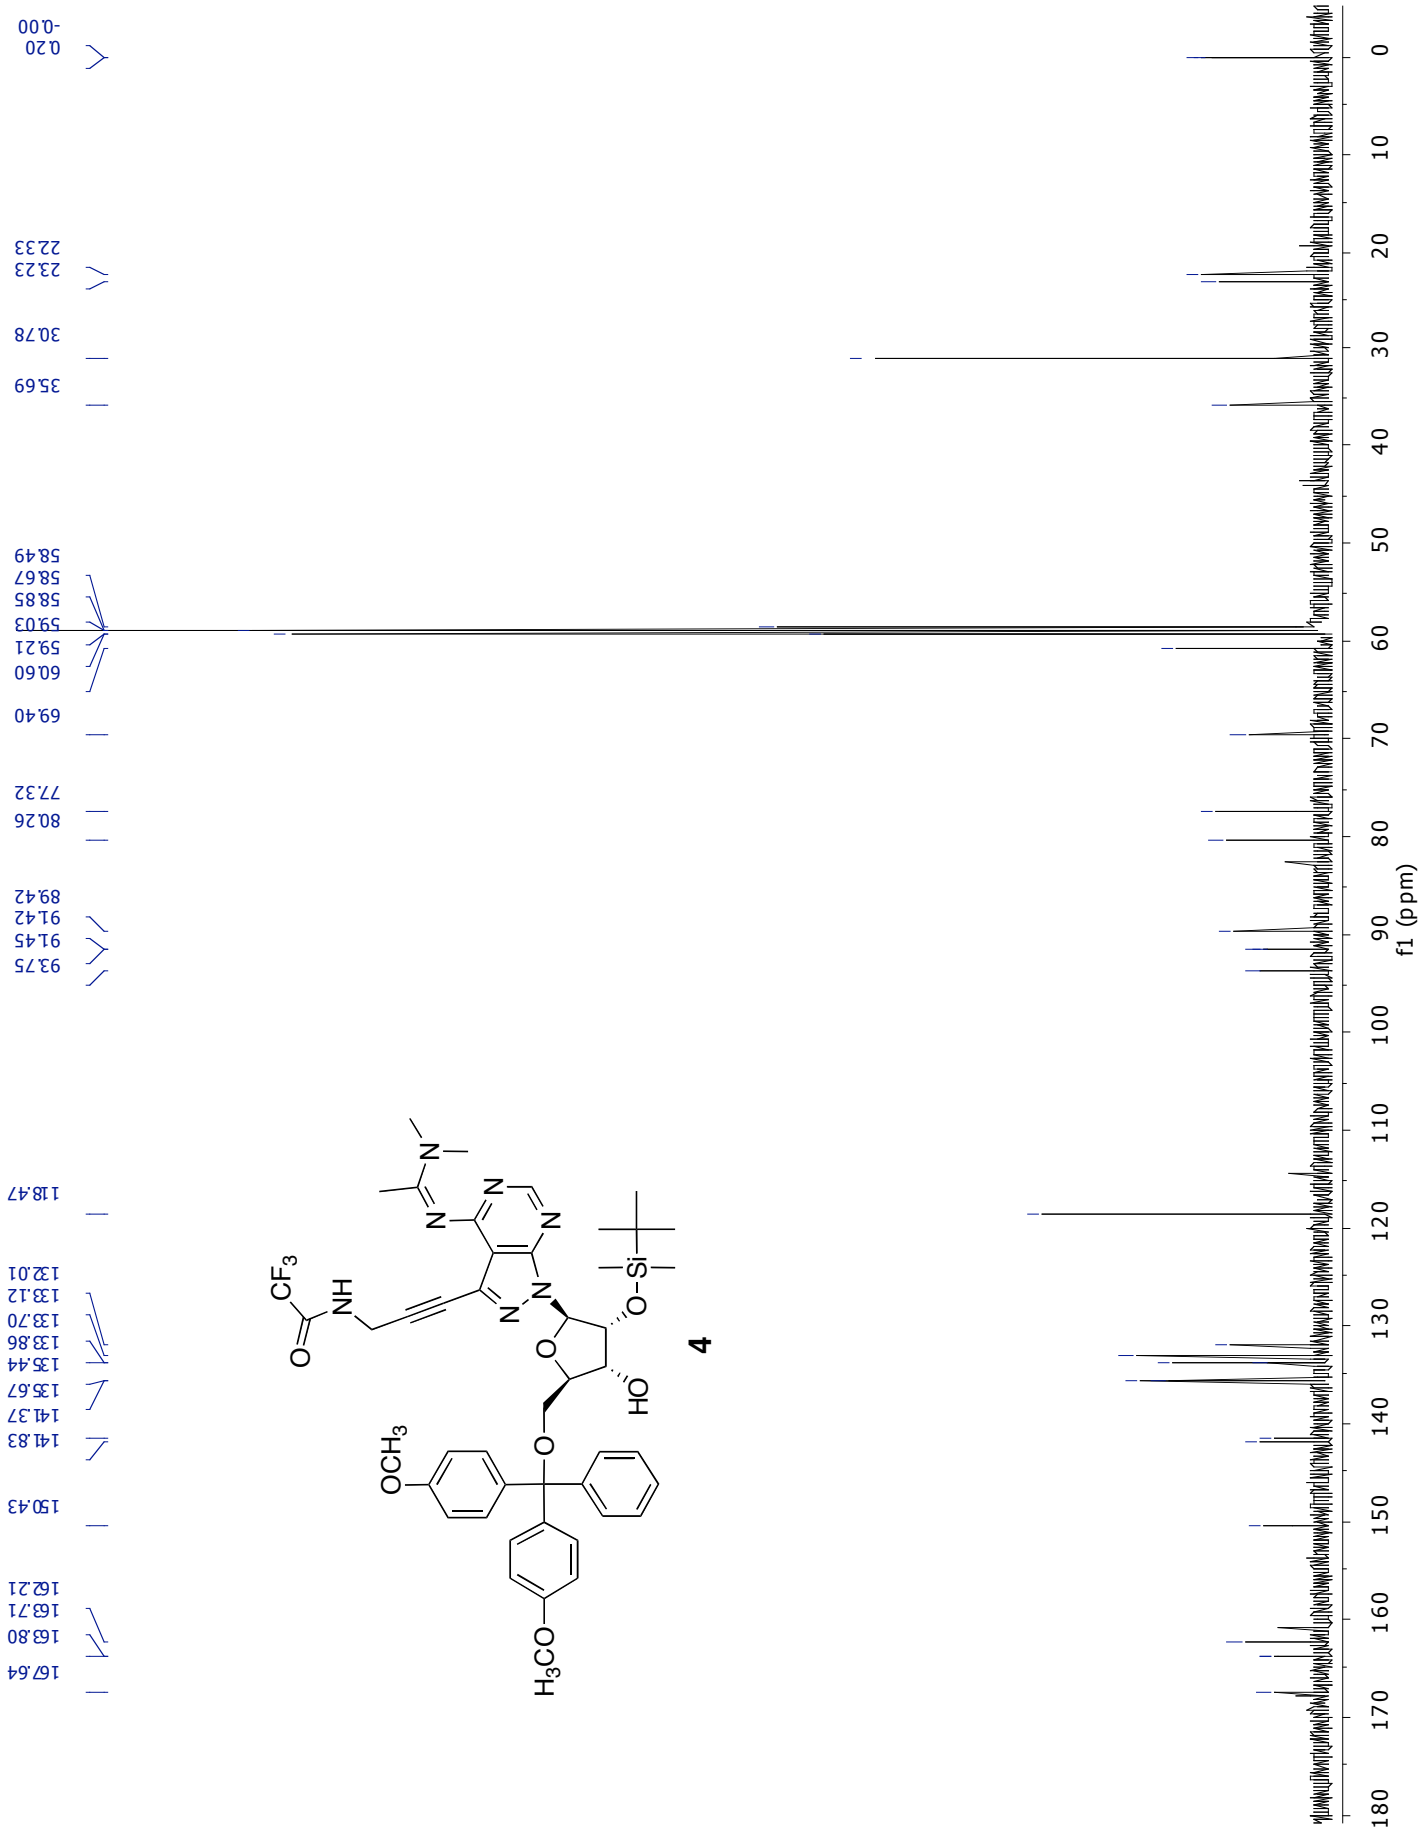



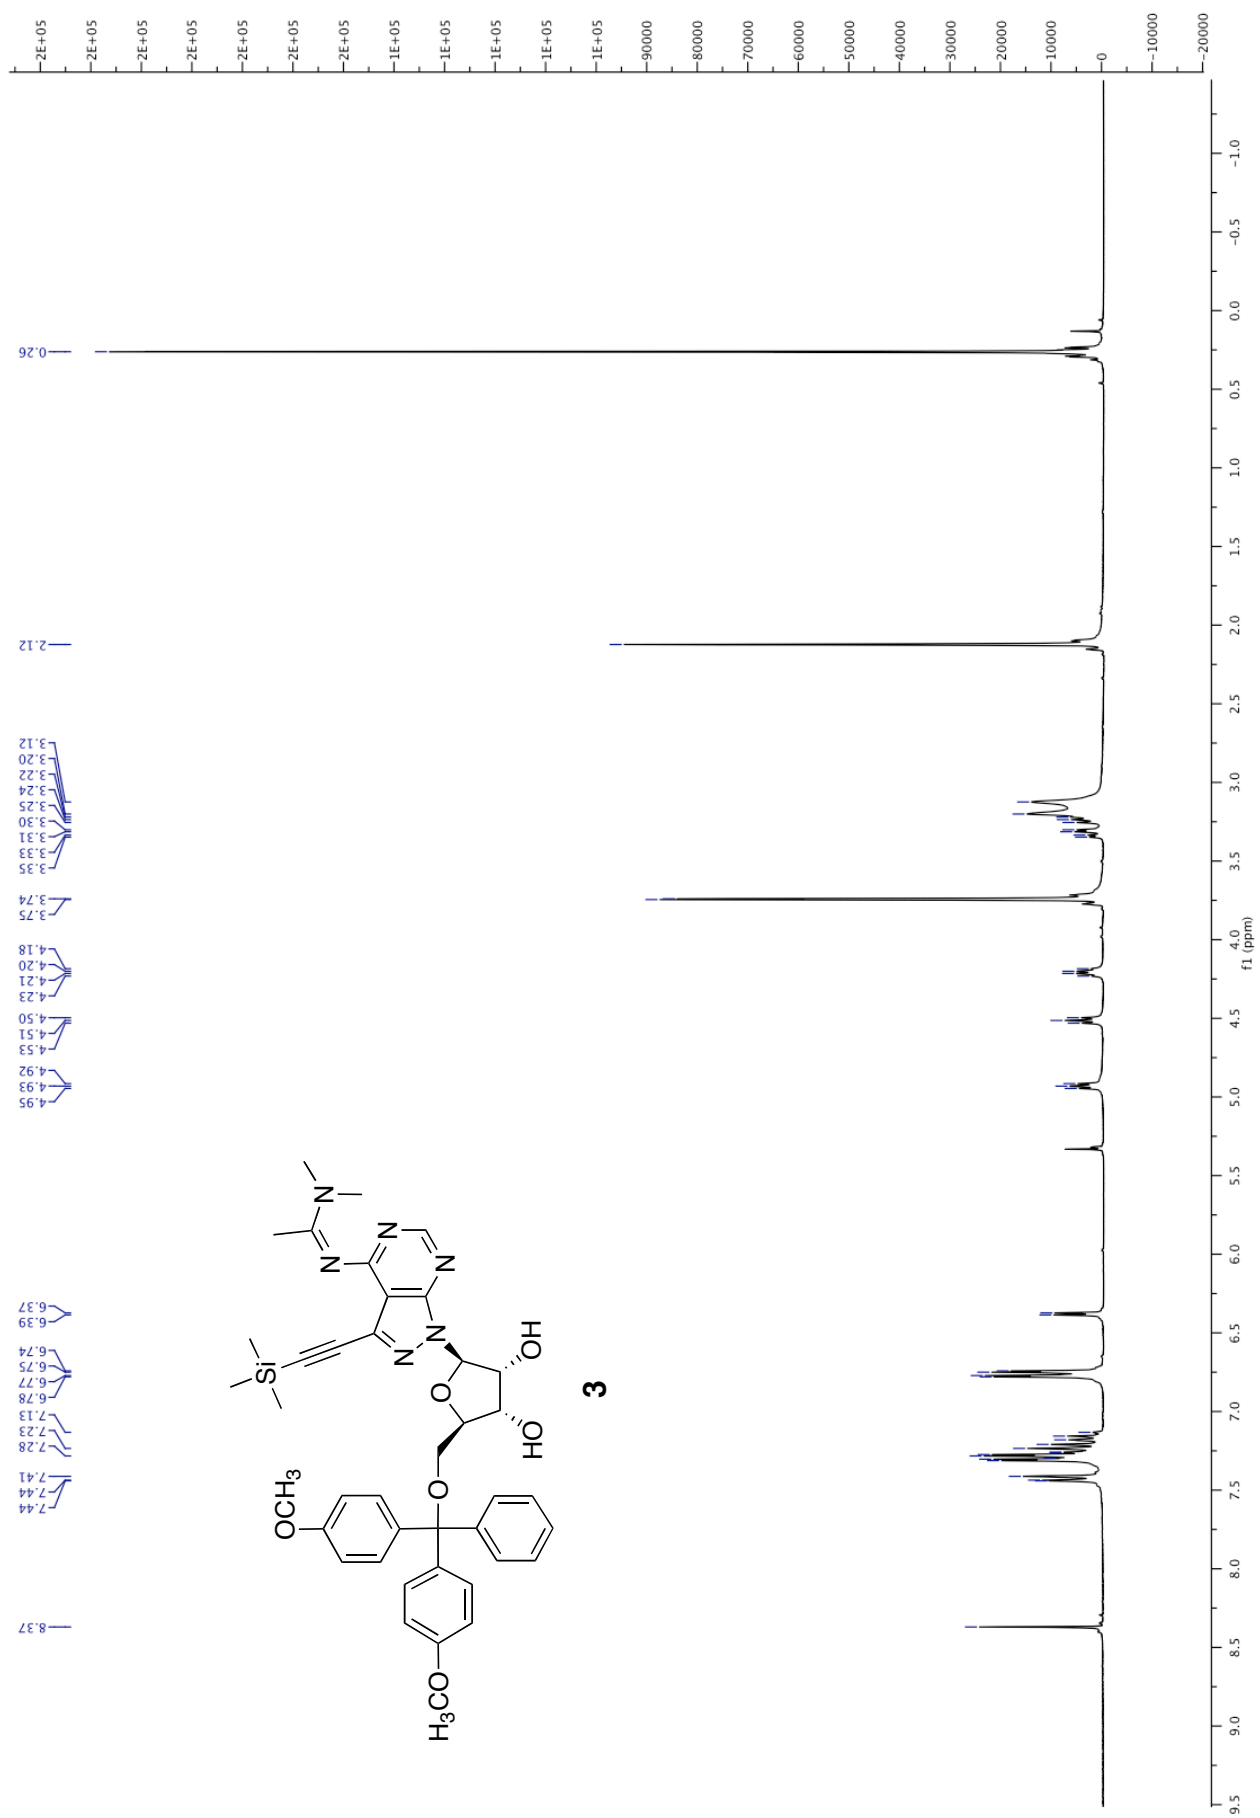



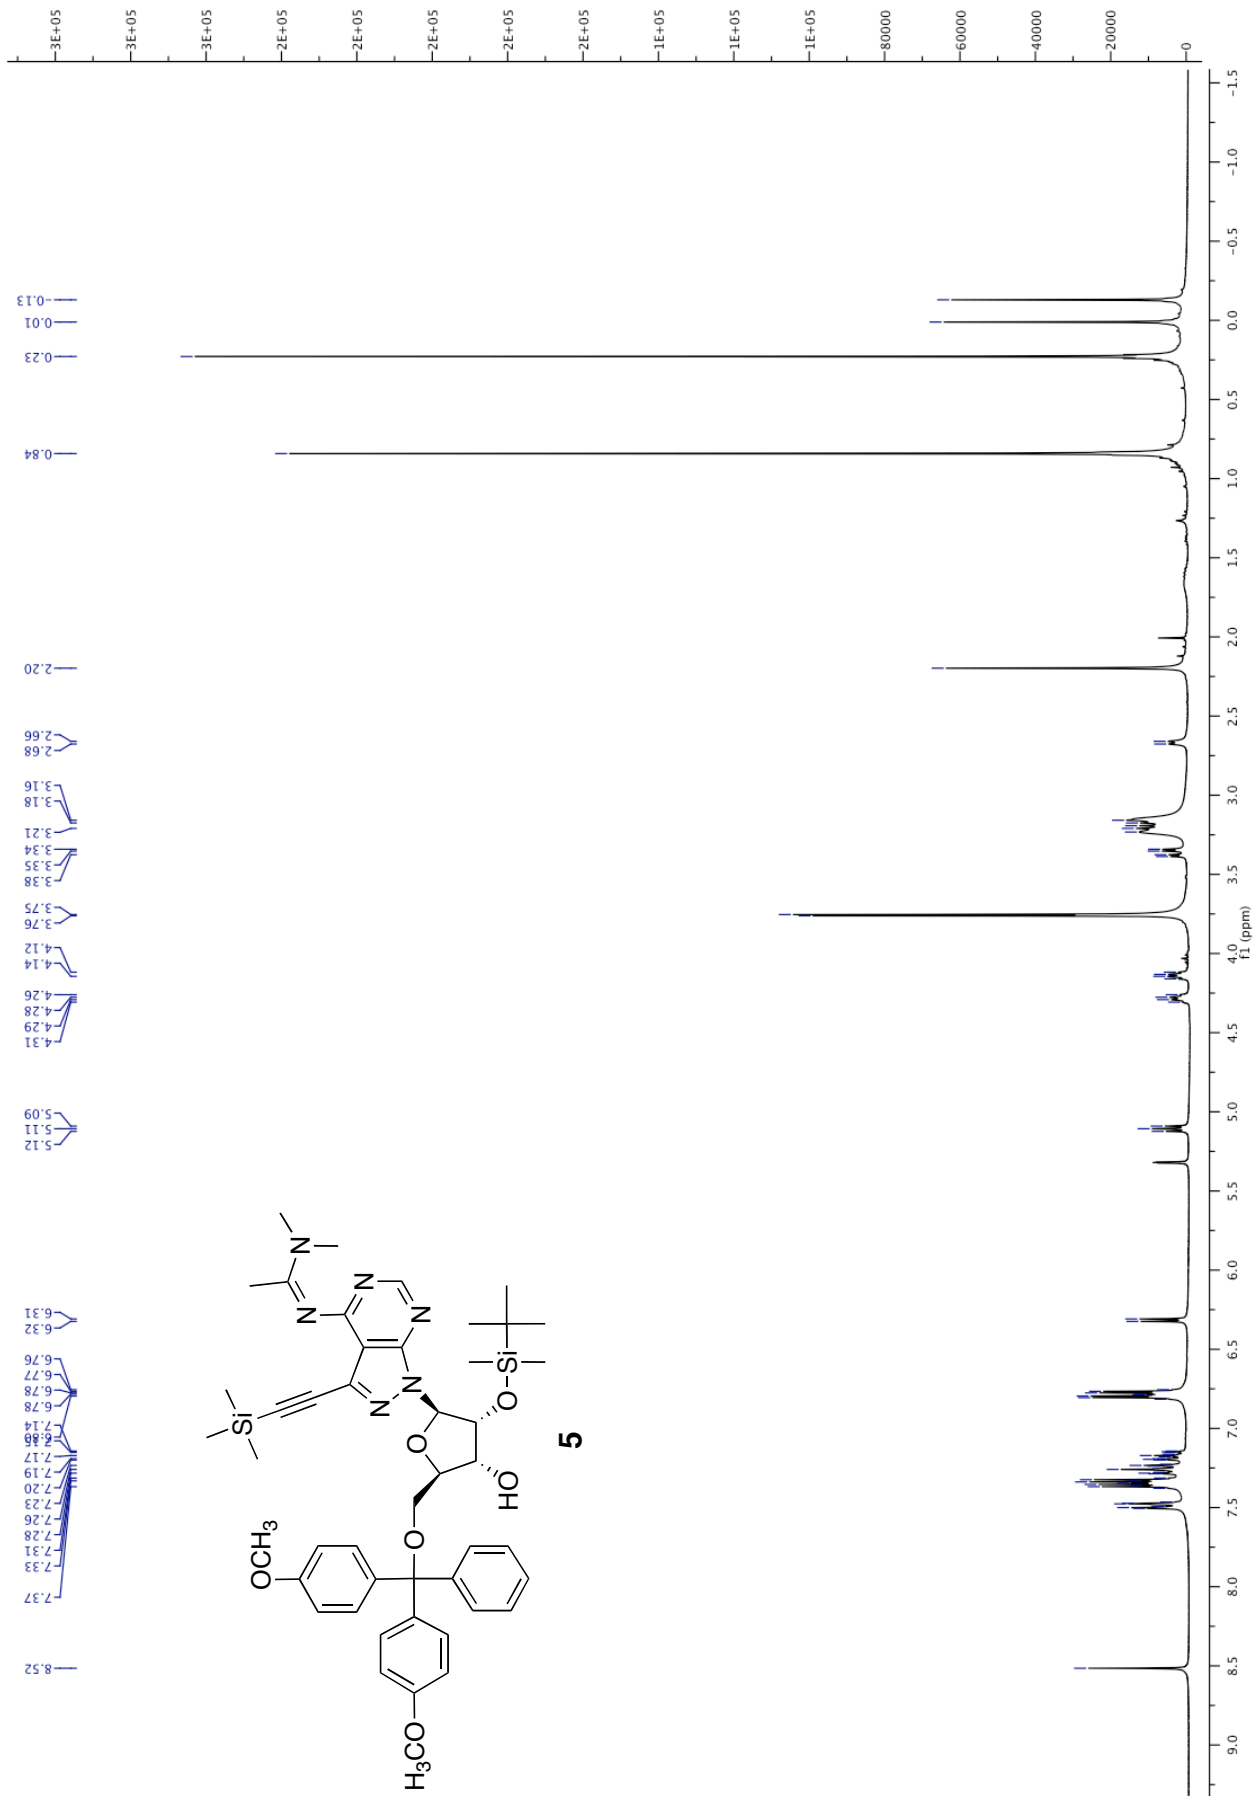

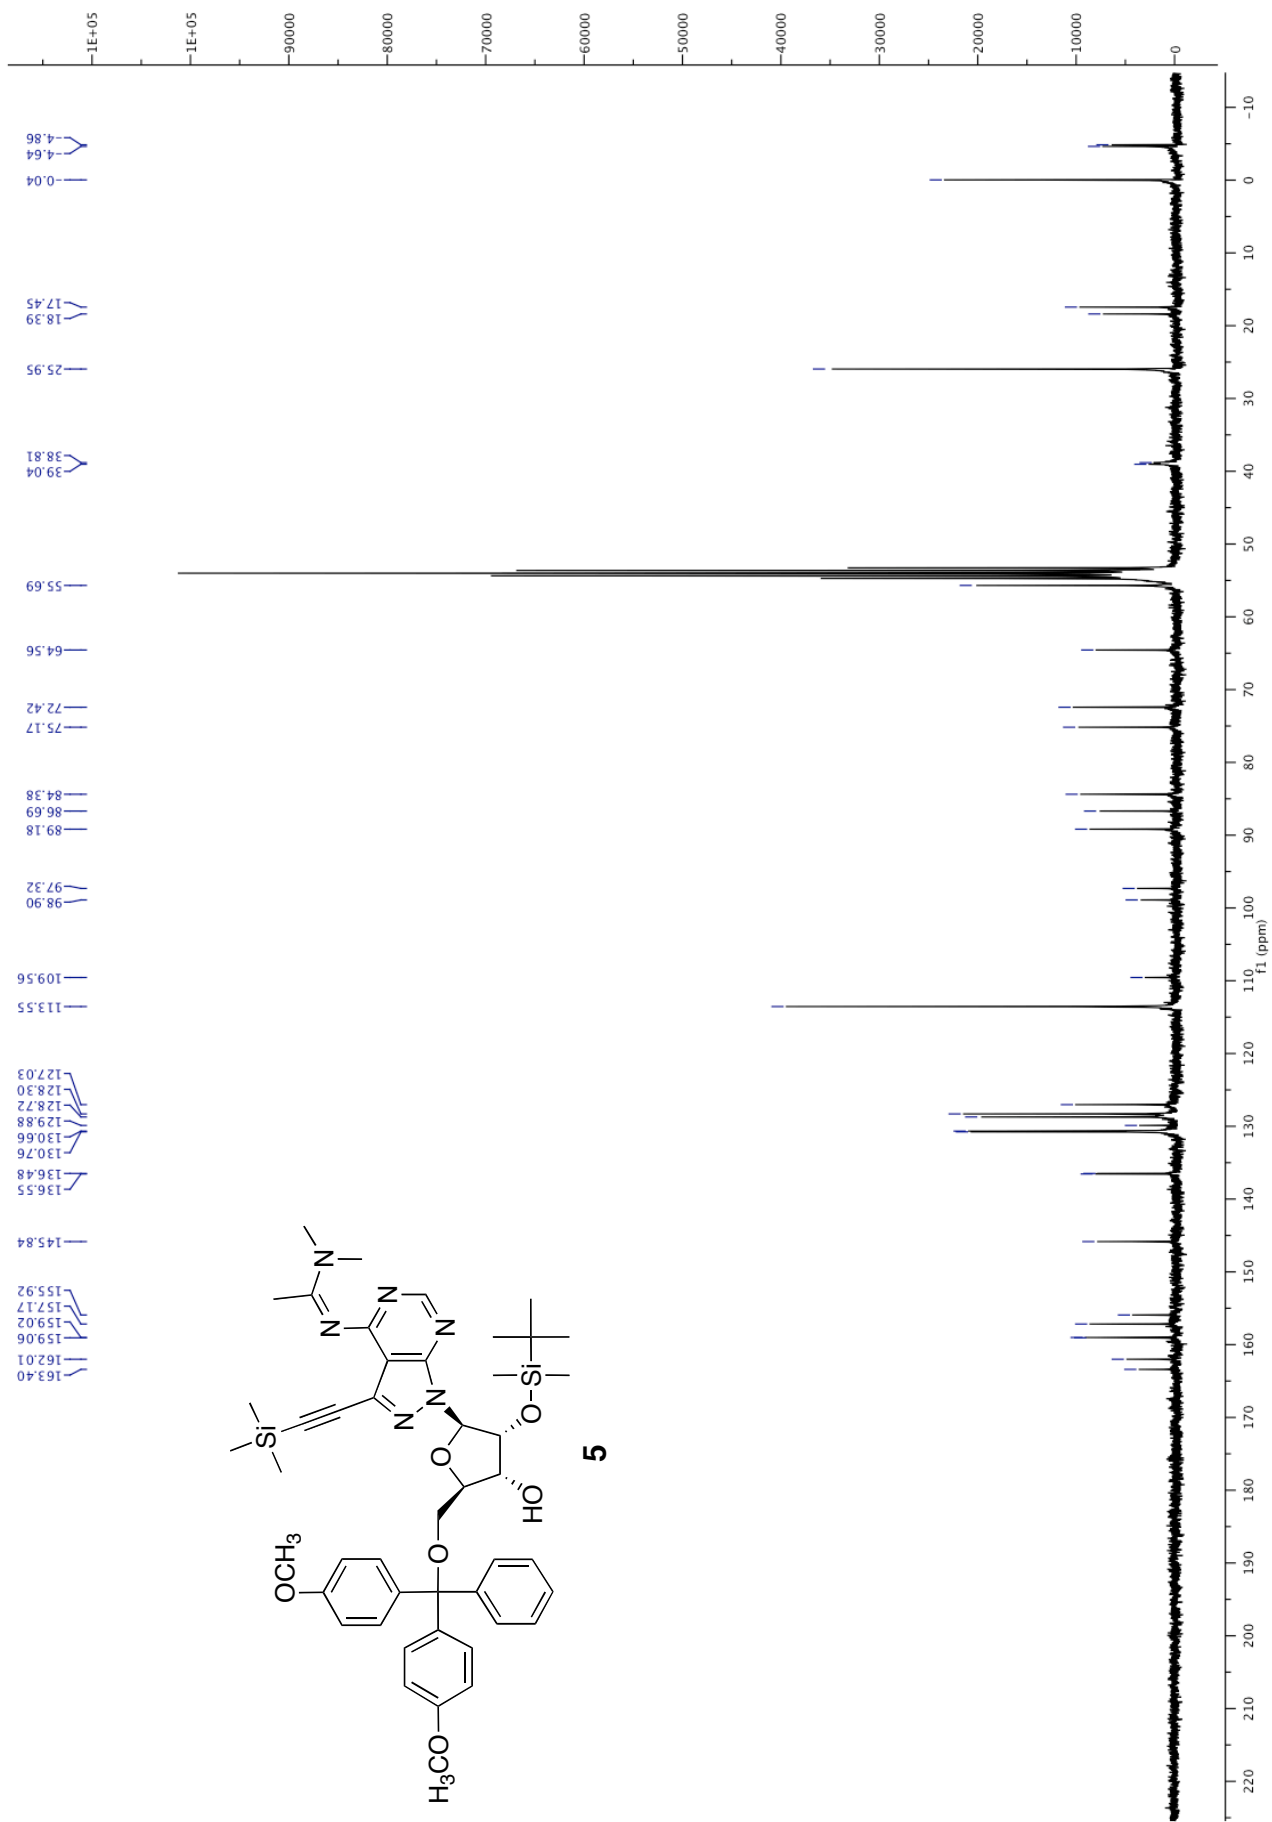

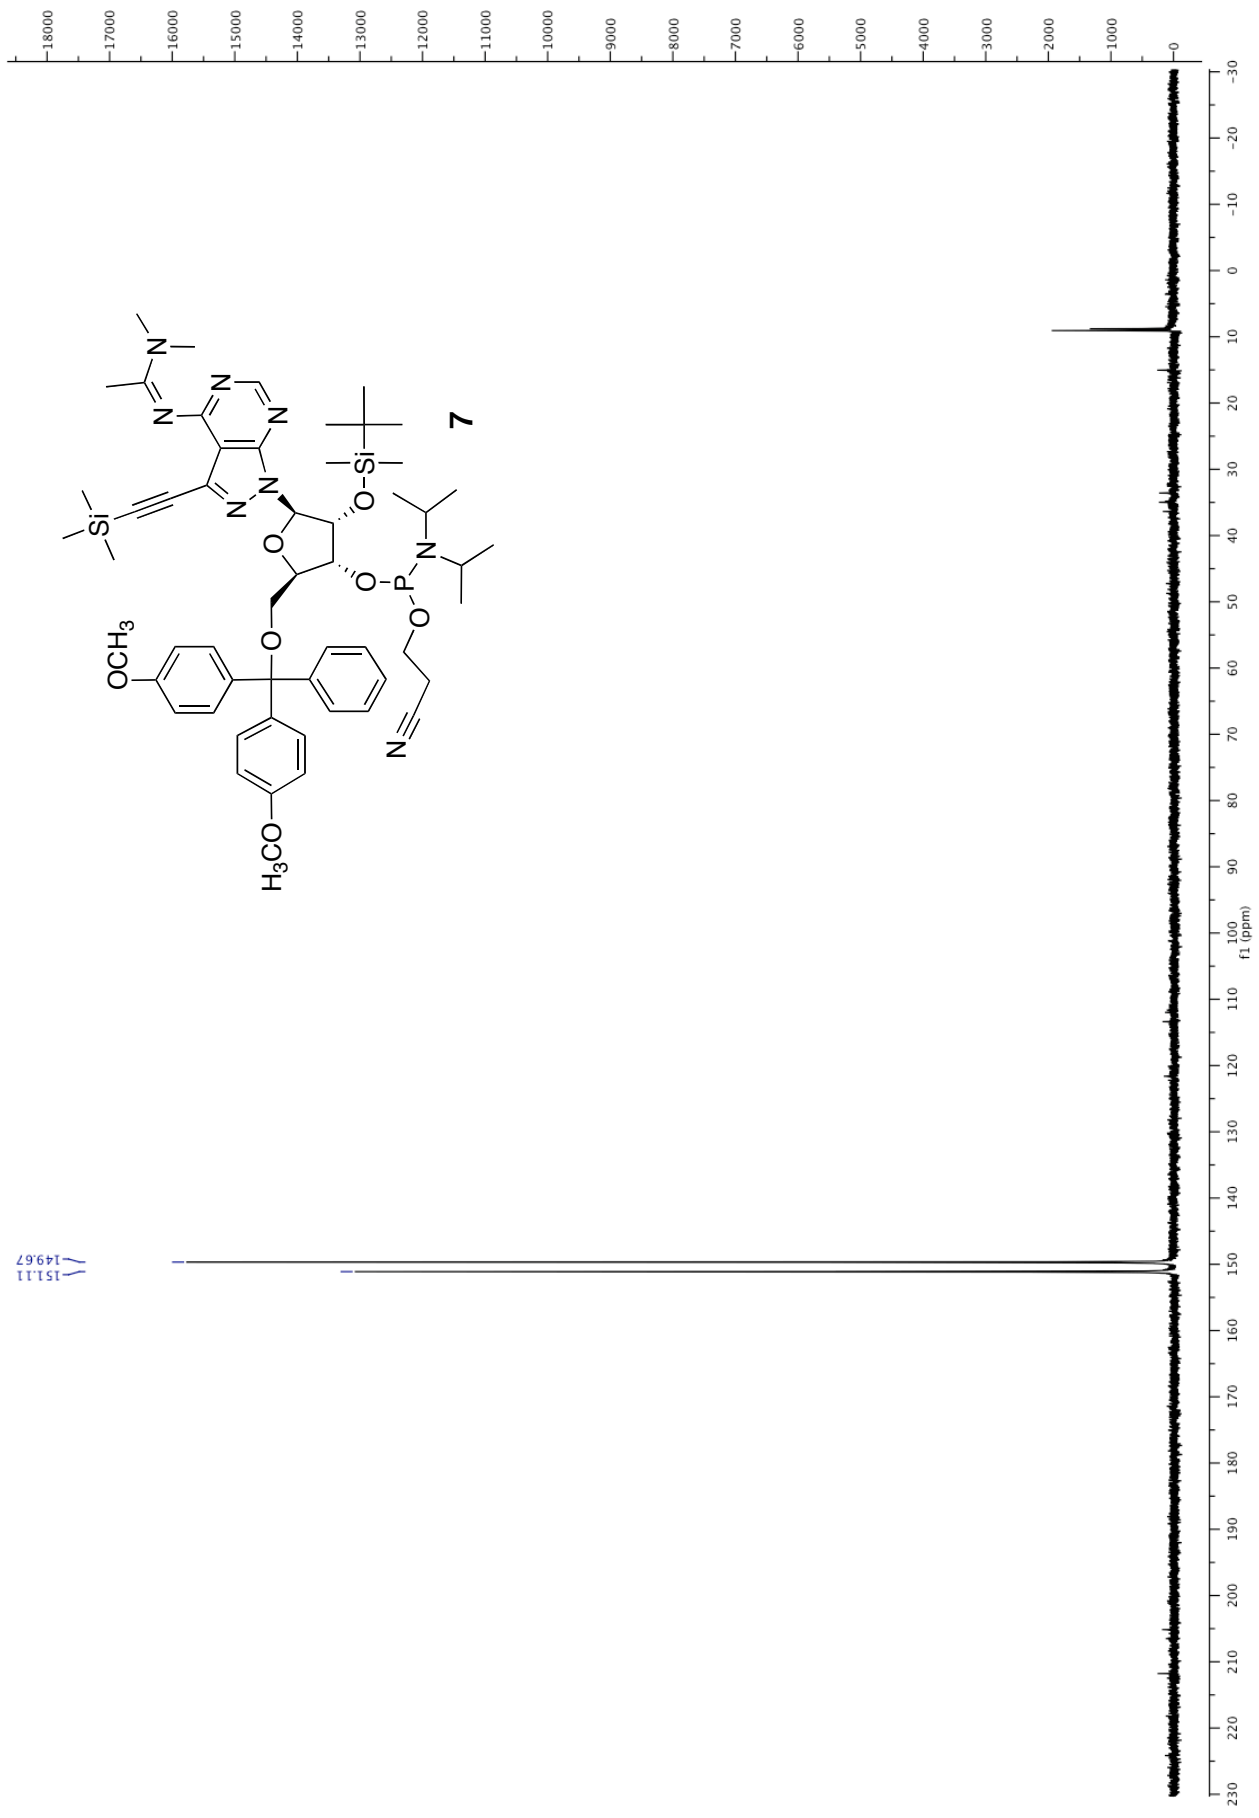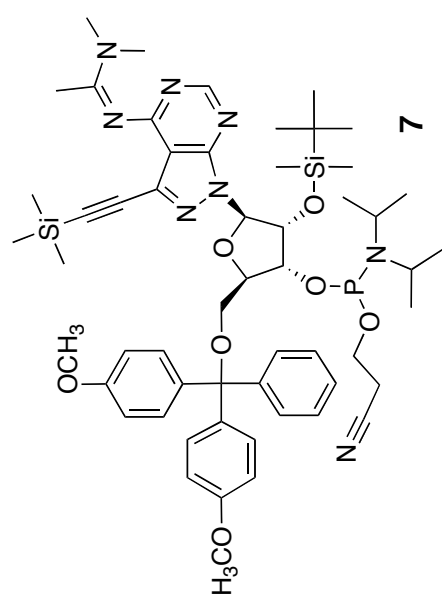

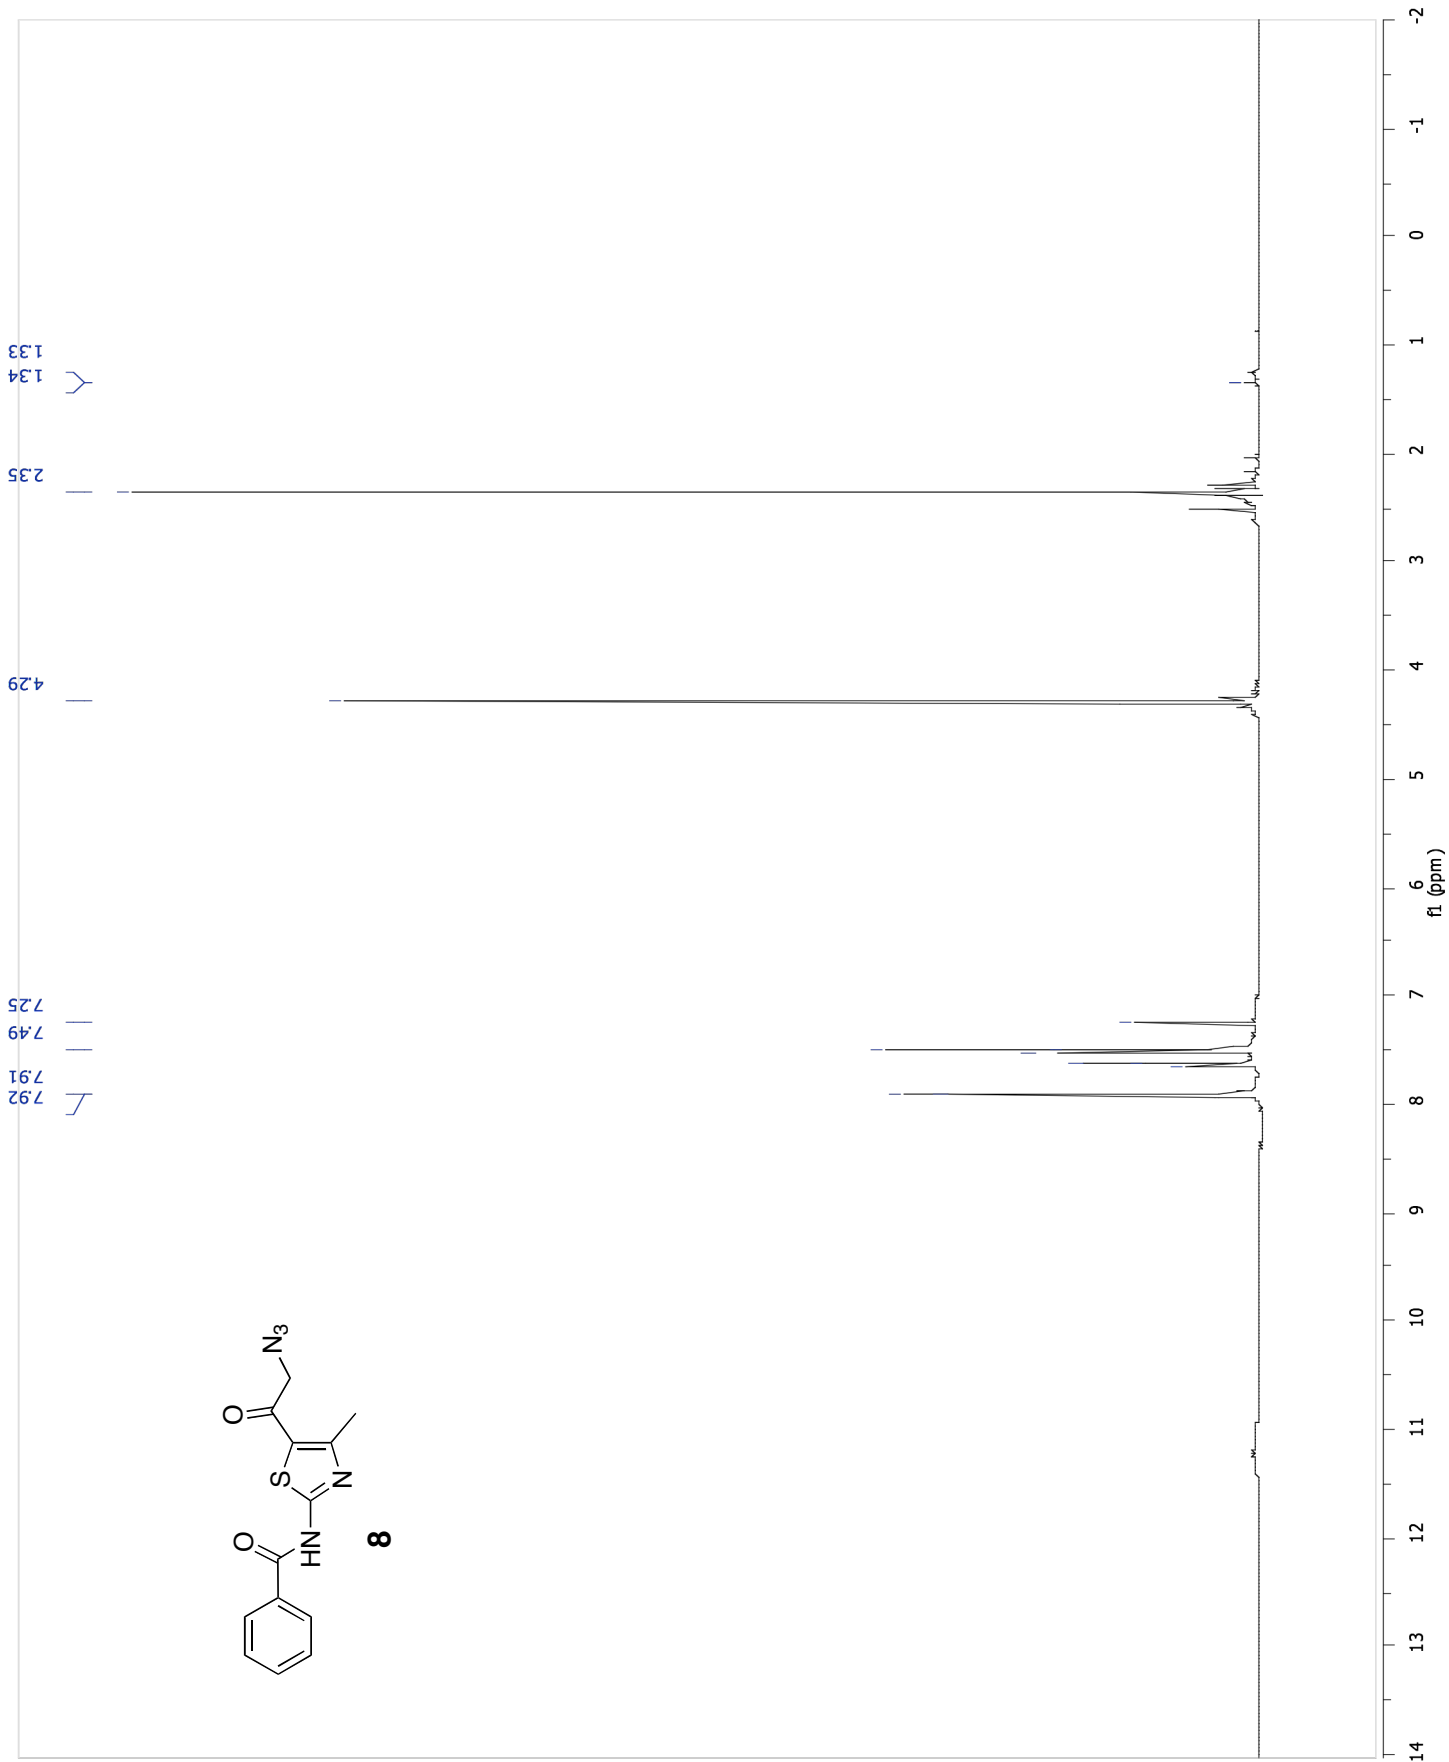



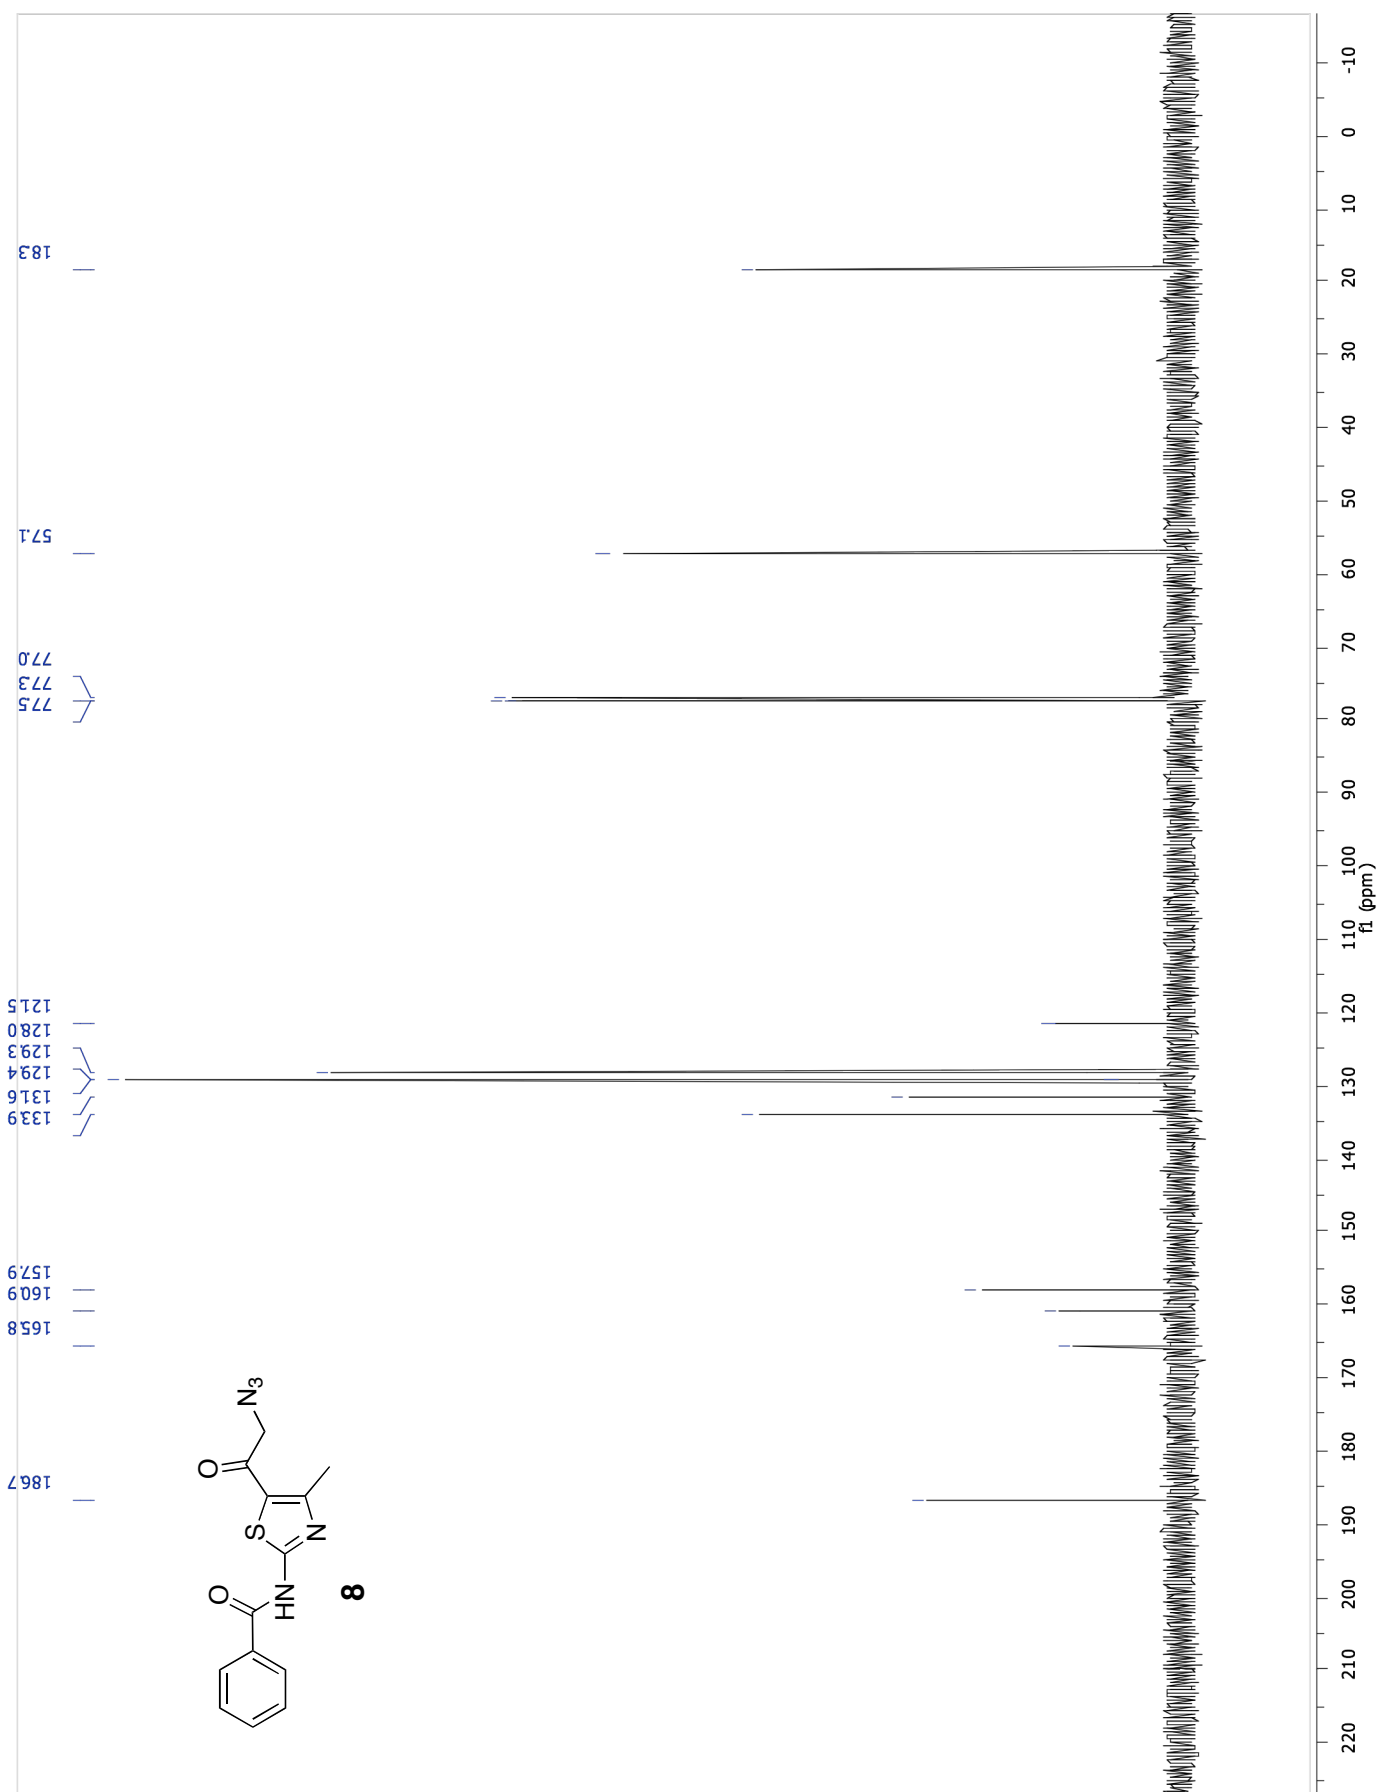

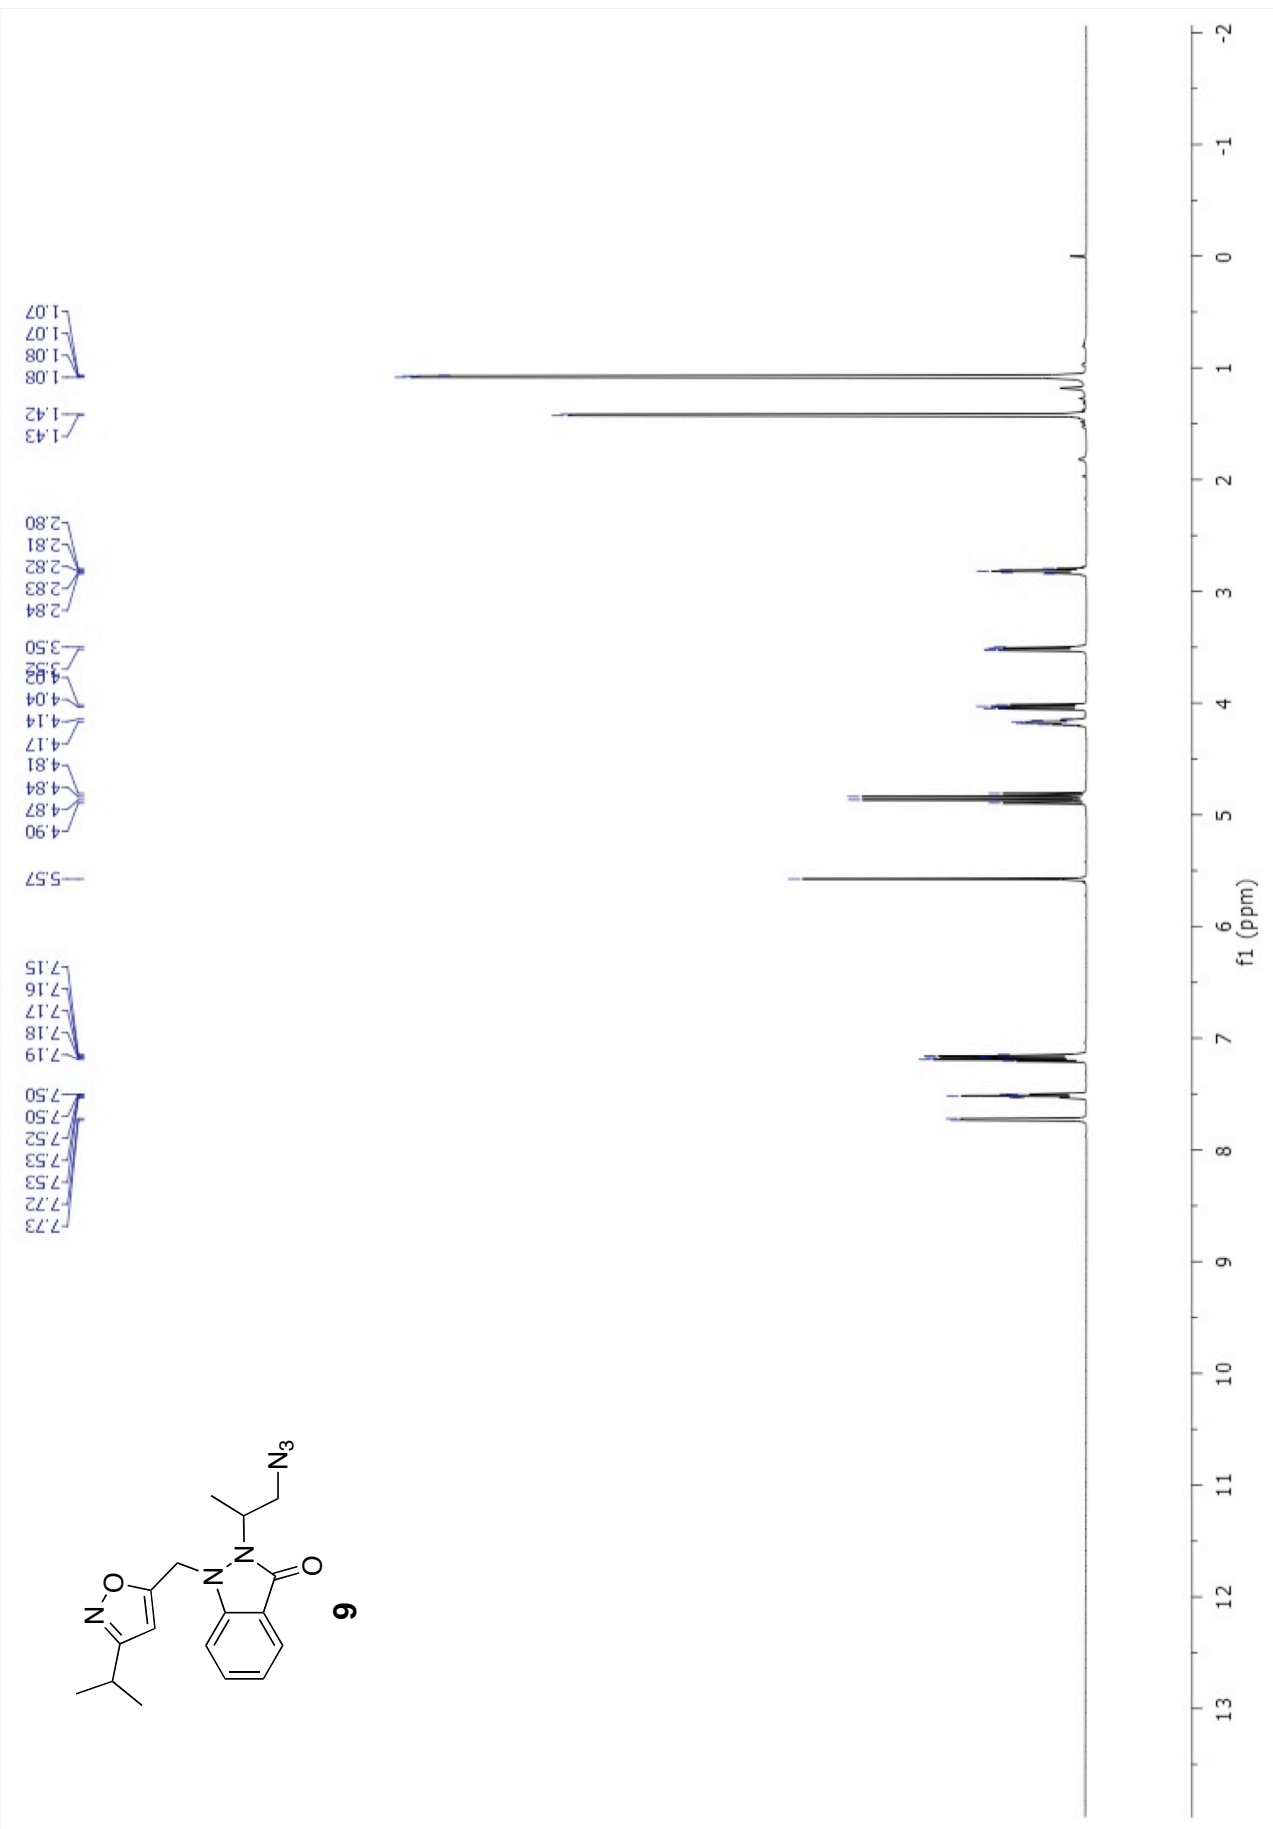

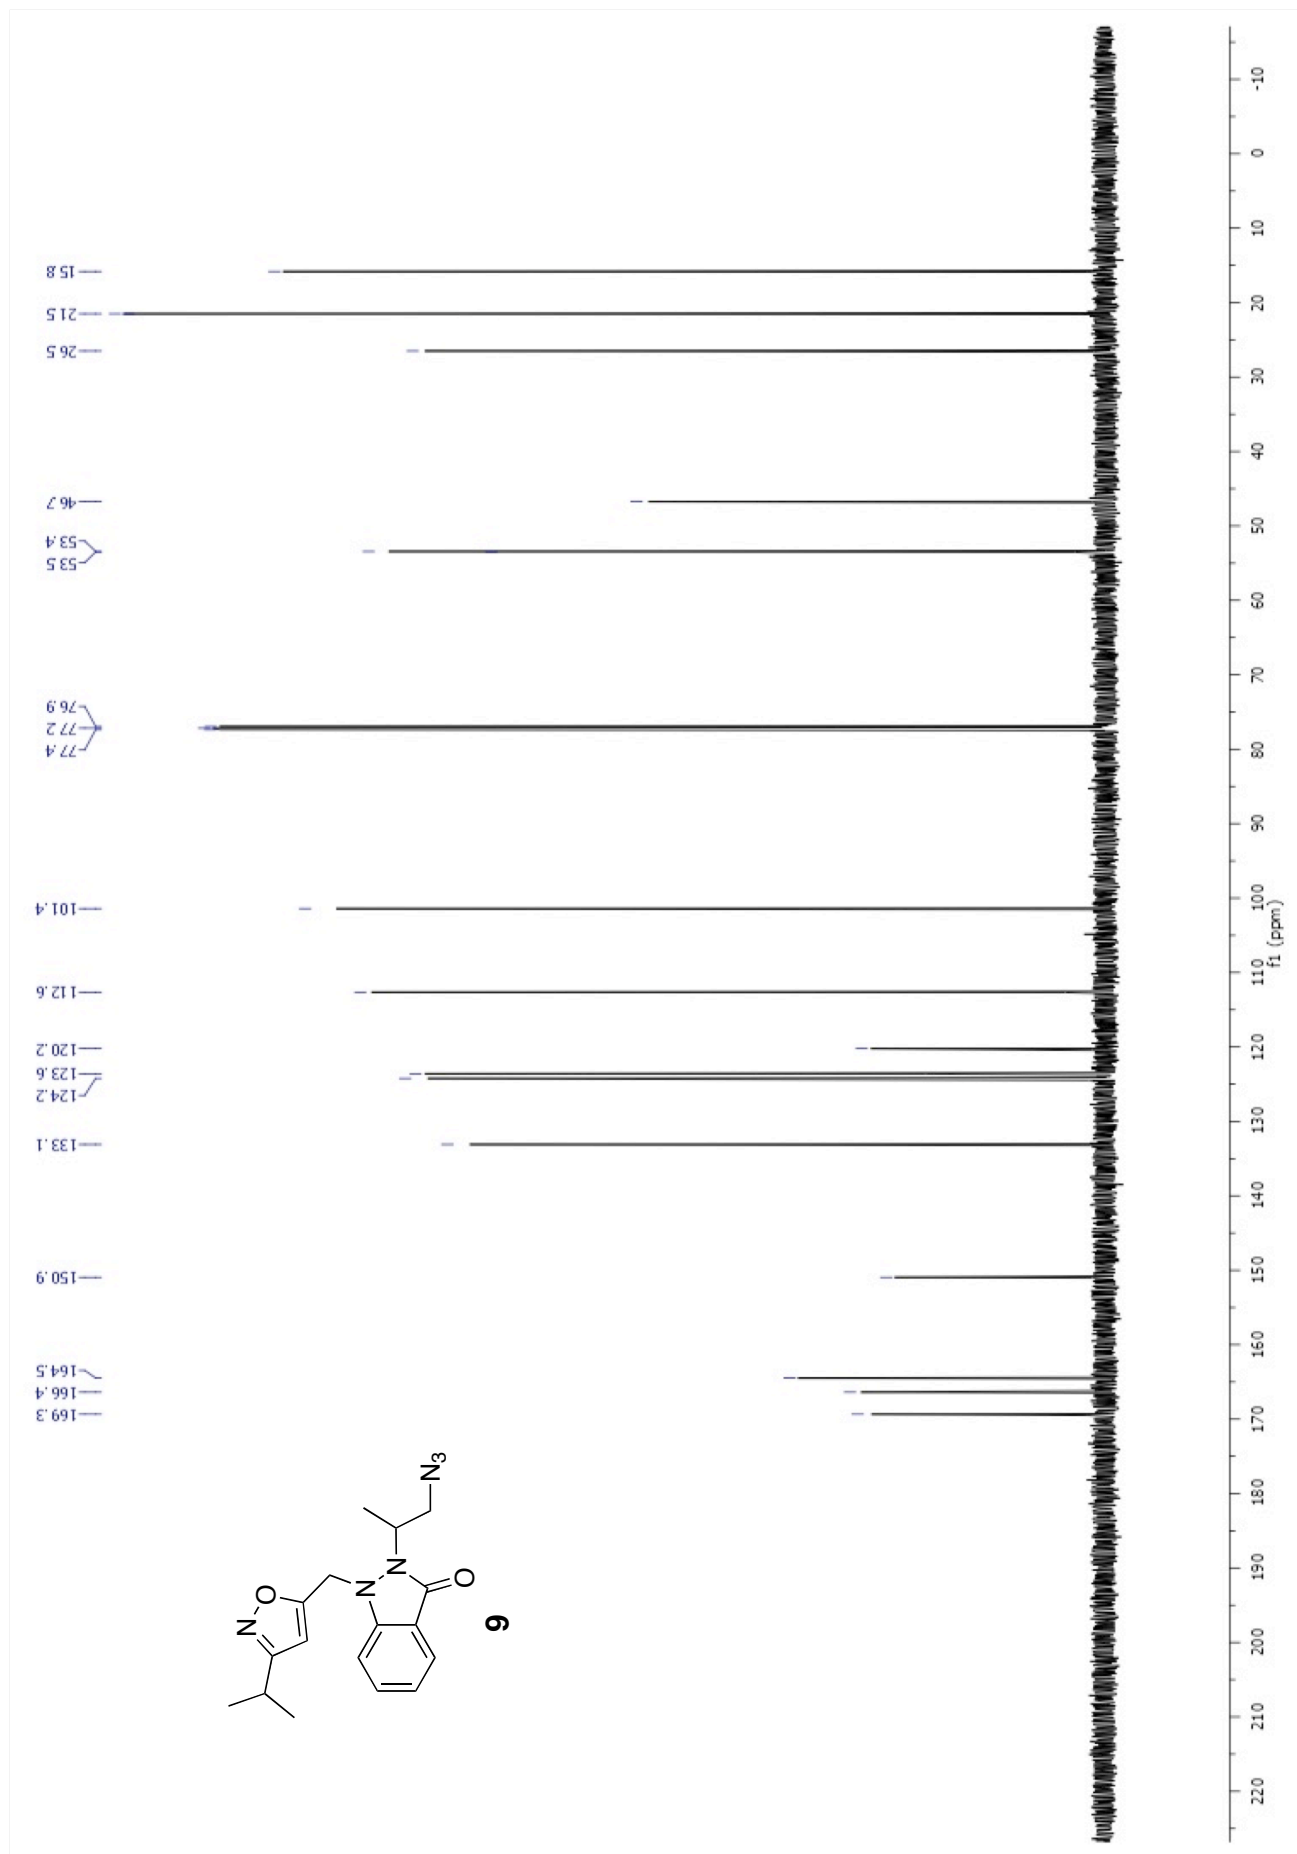

Supplement: NIHMS391294-supplement-ESI.pdf [file NIHMS391294-supplement-ESI.pdf]
